# Supplementary material
Source: ML conference proceedings conference paper supplement (https://aclanthology.org/2026.semeval-1.408)

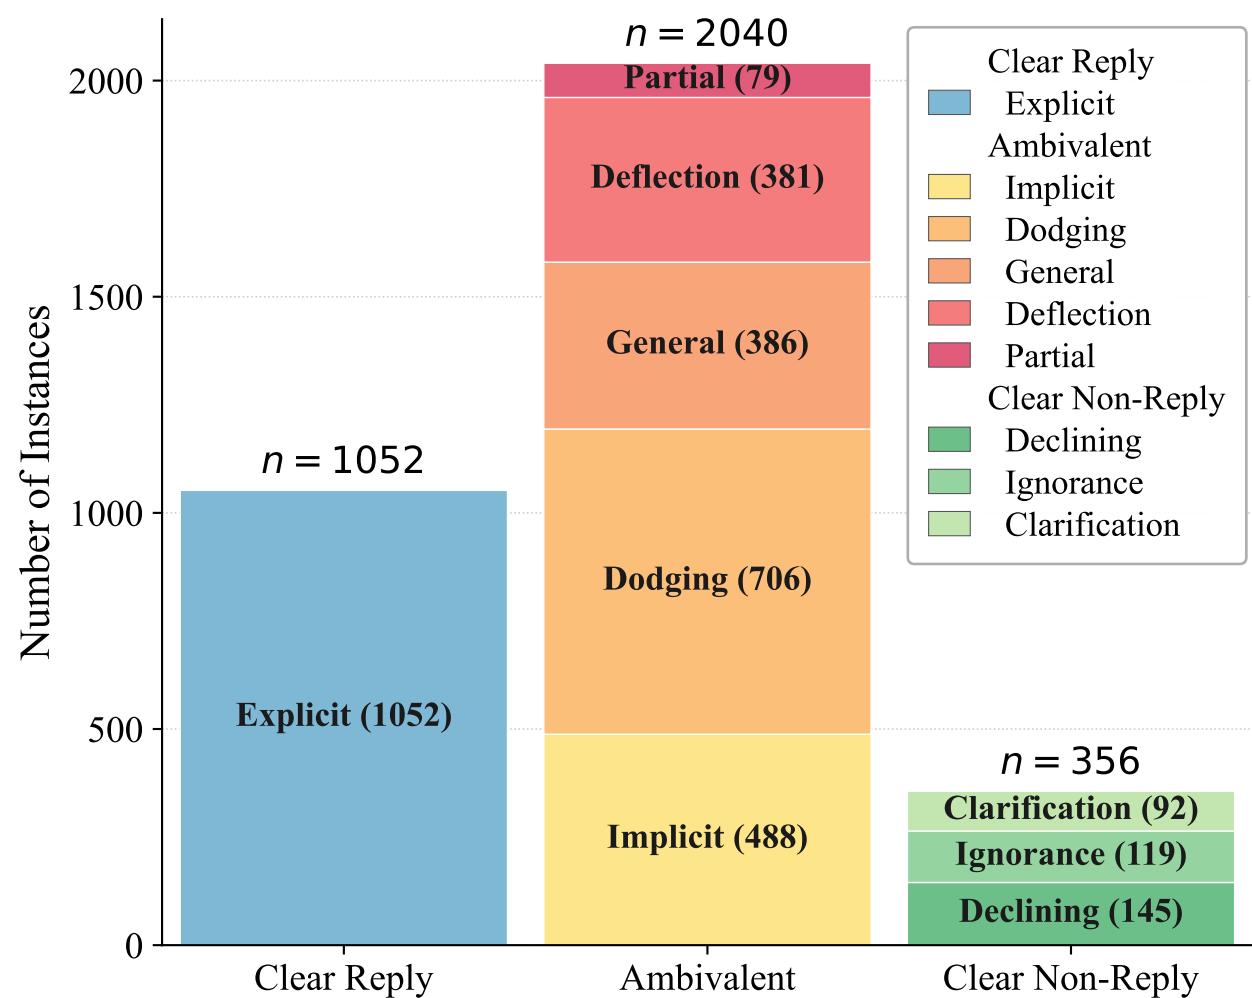

Supplement: SupplementaryMaterial [file class_distribution_train.pdf › latex/figures/class_distribution_train.pdf]

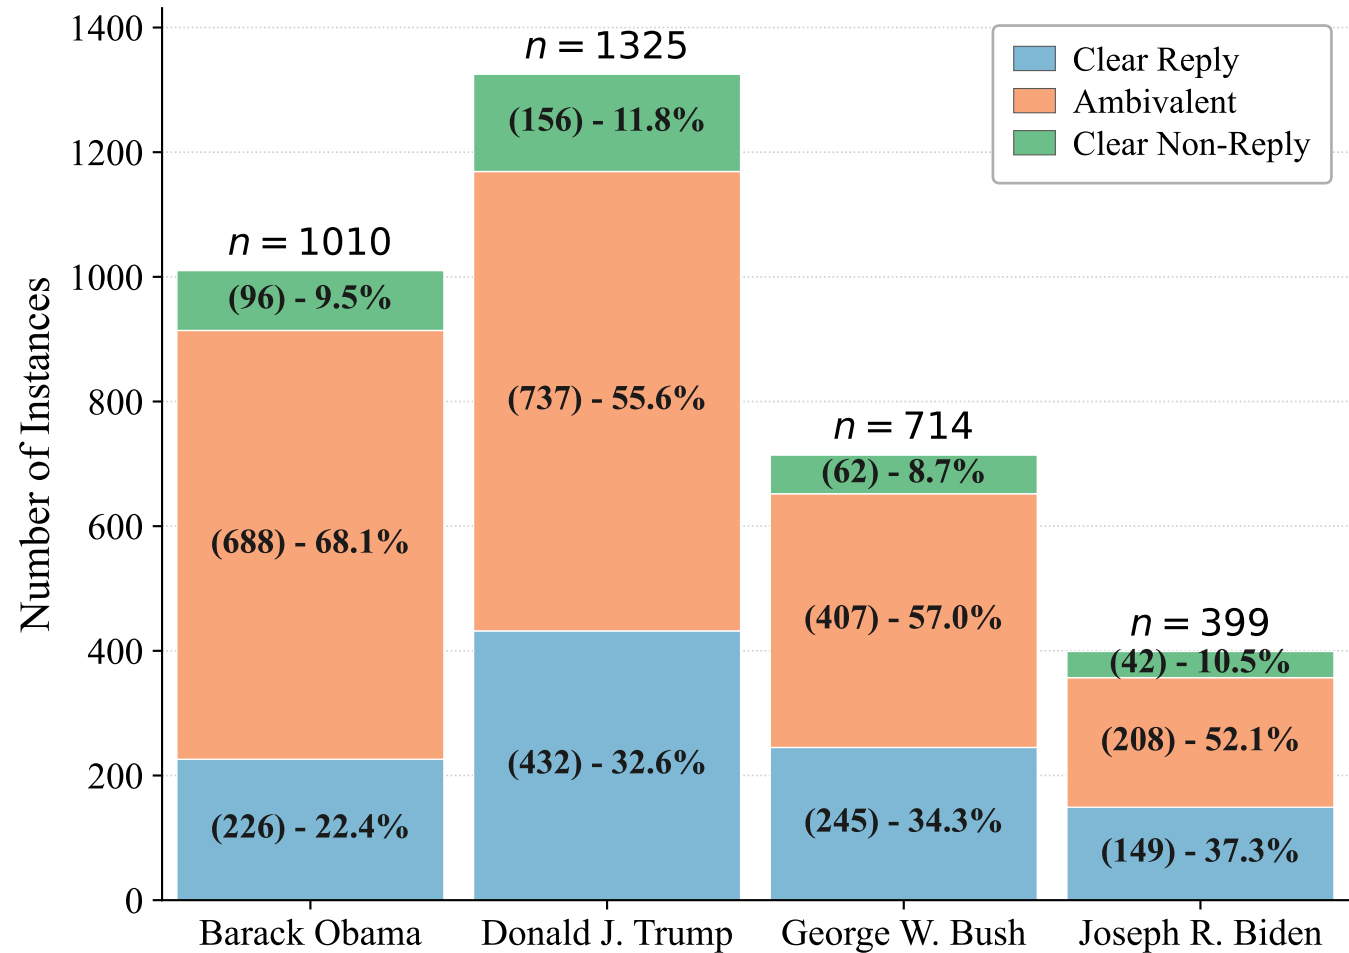

Supplement: SupplementaryMaterial [file president_distribution.pdf › latex/figures/president_distribution.pdf]
